# Supplementary material for: A role for HOX13 proteins in the regulatory switch between TADs at the HoxD locus
Source: PubMed Central journal article supplement (PMC4888838; doi:10.1101/gad.281055.116), 2016-05-15
Supplement: supp_gad.281055.116_Supplemental_material_index.pdf [file supp_gad.281055.116_Supplemental_material_index.pdf]

**HOX13 PROTEINS CONTROL THE REGULATORY  
SWITCH BETWEEN TADs AT THE *HoxD* LOCUS**

**SUPPLEMENTARY MATERIAL**

**Leonardo Beccari<sup>1,#</sup>, Nayuta Yakushiji-Kaminatsui<sup>2,#</sup>, Joost M. Woltering<sup>1,a,#</sup>,  
Anamaria Necsulea<sup>2</sup>, Nicolas Lonfat<sup>2,b</sup>, Edgardo Rodriguez-Carballo<sup>1</sup>,  
Benedicte Mascrez<sup>1</sup>, Shiori Yamamoto<sup>3</sup>, Atsushi Kuroiwa<sup>3</sup> and Denis Duboule<sup>1,2,\*</sup>**

<sup>1</sup>Department of Genetics and Evolution, University of Geneva, 1211 Geneva 4, Switzerland,  
<sup>2</sup>School of Life Sciences, Federal Institute of Technology, Lausanne, 1015 Lausanne,  
Switzerland, <sup>3</sup>Division of Biological Science, Graduate School of Science, Nagoya  
University, Furo-cho, Chikusa-ku, Nagoya, Japan.

<sup>a</sup>Present address: Department of Biology, University of Konstanz, Universitätsstraße 10,  
78457, Konstanz, Germany

<sup>b</sup>Present address: Department of Genetics and Department of Ophthalmology, Harvard  
Medical School, Boston, MA 02115, USA.

<sup>#</sup>These authors equally contributed to this work

**CONTENT**

**\*Extended Materials and Methods**

**\*Supplementary Figures S1 (related to Figure 1)**

**\*Supplementary Figures S2 (related to Figure 1)**

**\*Supplementary Figures S3 (related to Figure 3)**

**\*Supplementary Figures S4 (related to Figure 3)**

**\*Supplementary Figures S5 (related to Figure 4)**

**\*Supplementary Figures S6 (related to Figure 4)**

**\*Supplementary Figures S7 (related to Figure 5)**

**\*References**
